# Supplementary material for: Understanding Au facet effects in photocatalytic nonoxidative coupling of methane
Source: Royal Society of Chemistry journal article supplement (doi:10.1039/d3qm01252b), 2024-01-01
Supplement: d3qm01252b1.pdf [file d3qm01252b1.pdf]

## Supporting Information

### **Understanding Au Facet Effects in Photocatalytic Nonoxidative Coupling of Methane**

Zhuo Liu, Biyang Xu, Xuanzhao Lu, Pan Li, Jun-Jie Zhu and Wenlei  
Zhu\*

*State Key Laboratory of Pollution Control and Resource Reuse, State Key  
Laboratory of Analytical Chemistry for Life Science, the Frontiers  
Science Center for Critical Earth Material Cycling, School of the  
Environment, School of Chemistry and Chemical Engineering, Nanjing  
University, Nanjing 210023, People's Republic of China*

*\*E-mail: wenleizhu@nju.edu.cn*

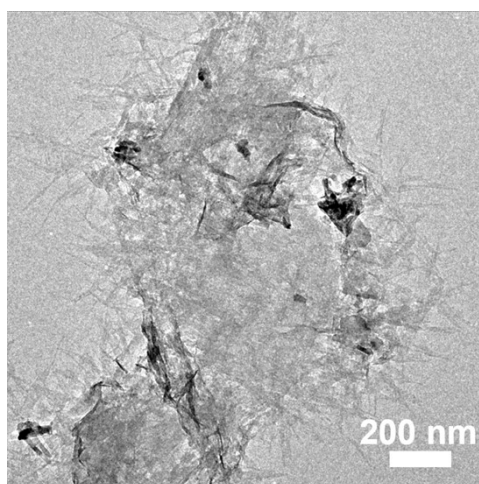

**Figure S1.** TEM images of ZnO nanosheets.

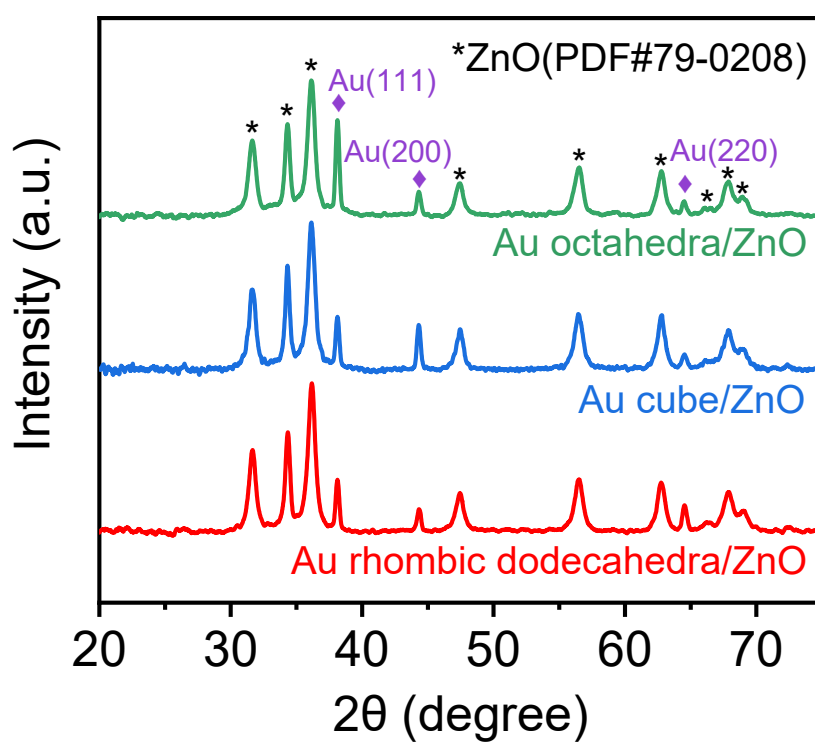

**Figure S2.** XRD patterns of Au/ZnO composite catalysts.

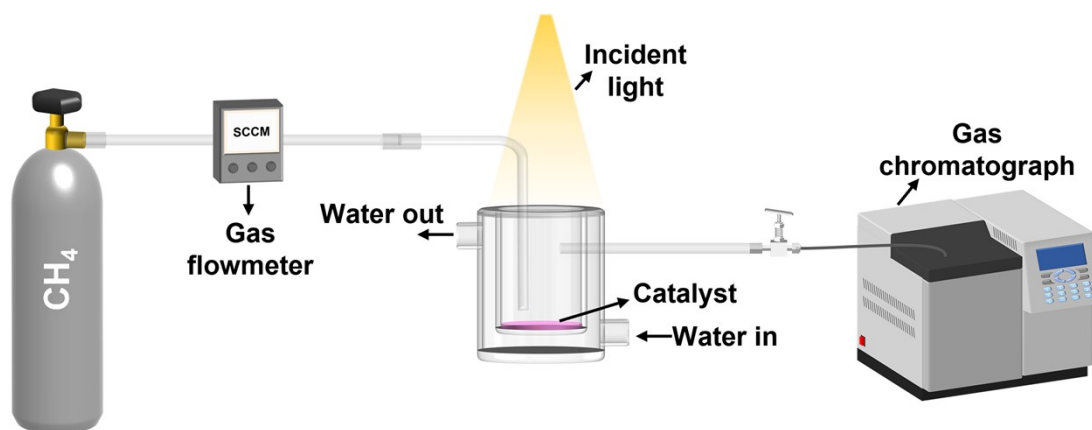

**Figure S3.** Schematic of the experimental set-up used to test photocatalytic NOCM reaction.

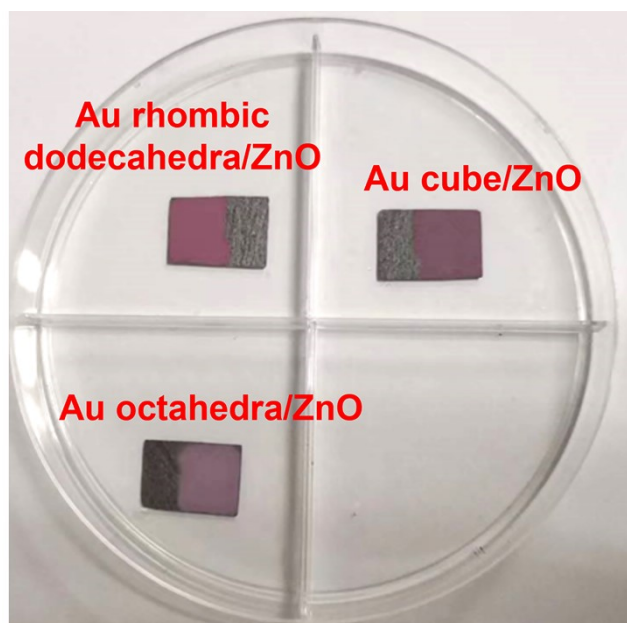

**Figure S4.** Schematic diagram of coating an equal amount of ZnO/Au hybrid catalysts on carbon paper.

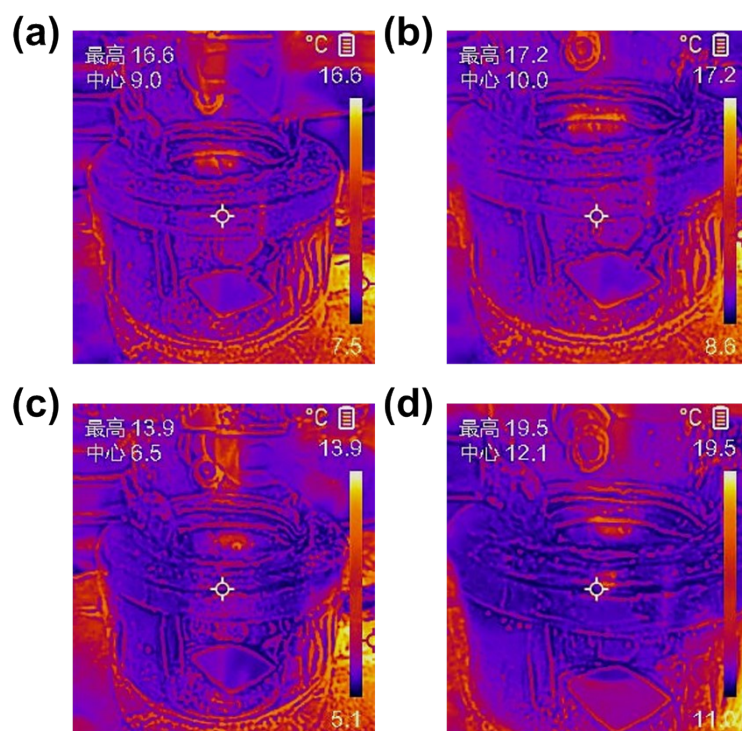

**Figure S5.** *In situ* thermographic photographs of Au octahedra/ZnO during catalytic reaction. (a) 0 h, (b) 1 h, (c) 2 h and (d) 3 h.

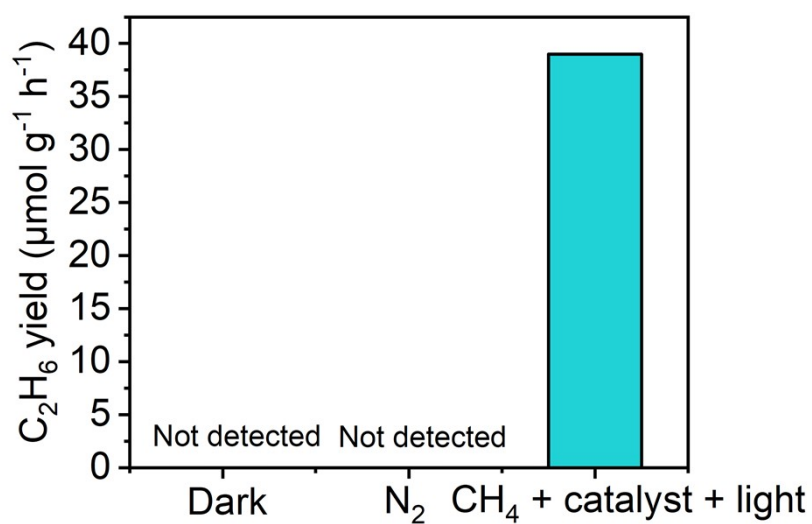

**Figure S6.** Performance of photocatalytic NOCM reaction under different conditions (the catalyst used is Au octahedra/ZnO hybrid catalyst).

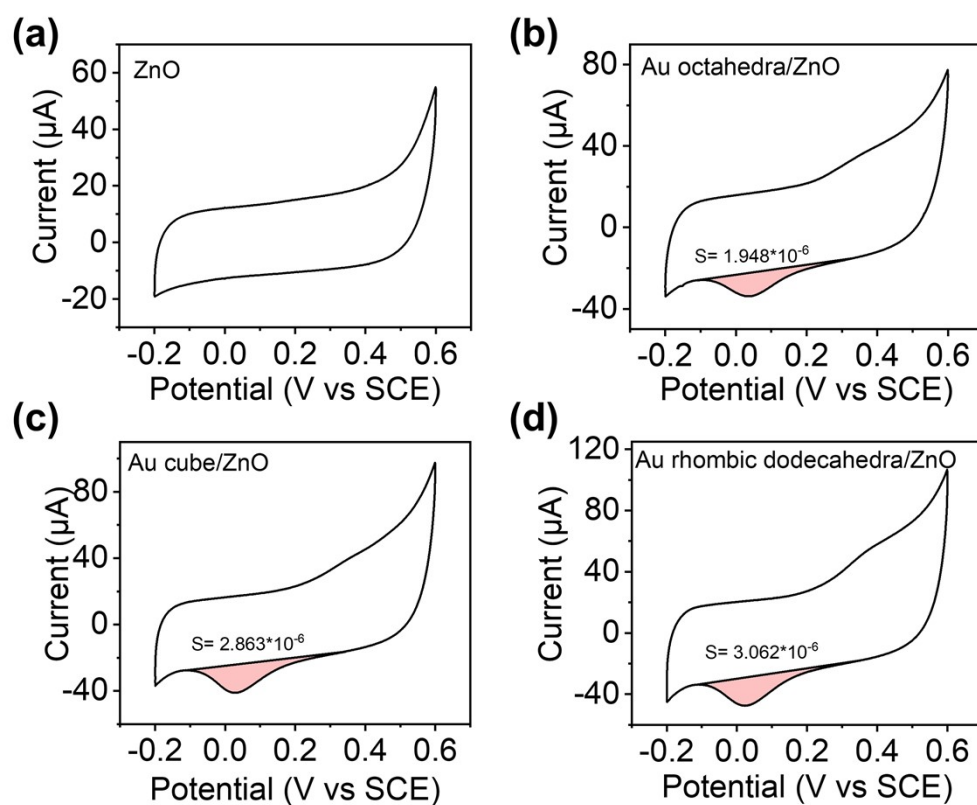

**Figure S7.** Cyclic voltammograms (CV) of Au/ZnO hybrid catalyst. (a) ZnO, (b) Au octahedra/ZnO, (c) Au cube/ZnO, (d) Au rhombic dodecahedra/ZnO. The electrolyte is 1 M NaOH and scan rate is 50 mV s<sup>-1</sup>.

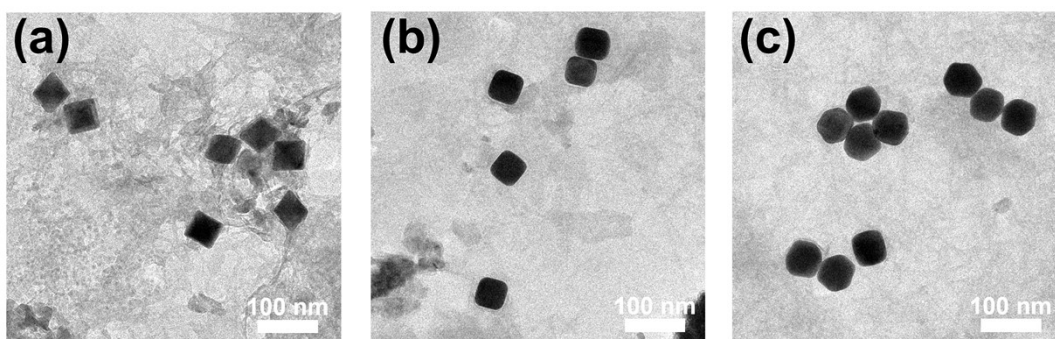

**Figure S8.** The morphology of Au/ZnO hybrid catalysts after 3 hours of reaction. (a) Au octahedra/ZnO. (b) Au cube/ZnO. (c) Au rhombic

dodecahedra/ZnO.

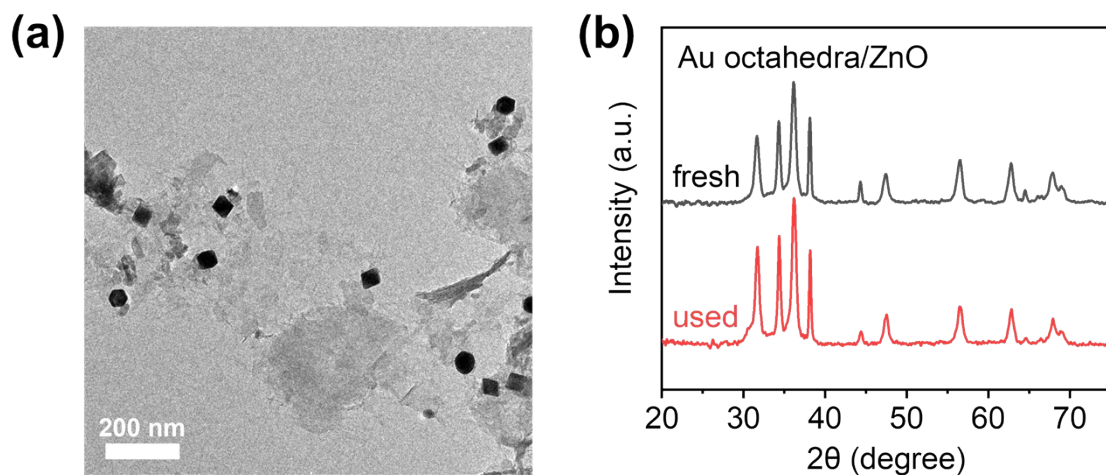

**Figure S9.** (a) The morphology of Au octahedra/ZnO hybrid catalyst after reaction. (b) XRD patterns of the fresh and used Au octahedra/ZnO photocatalyst.

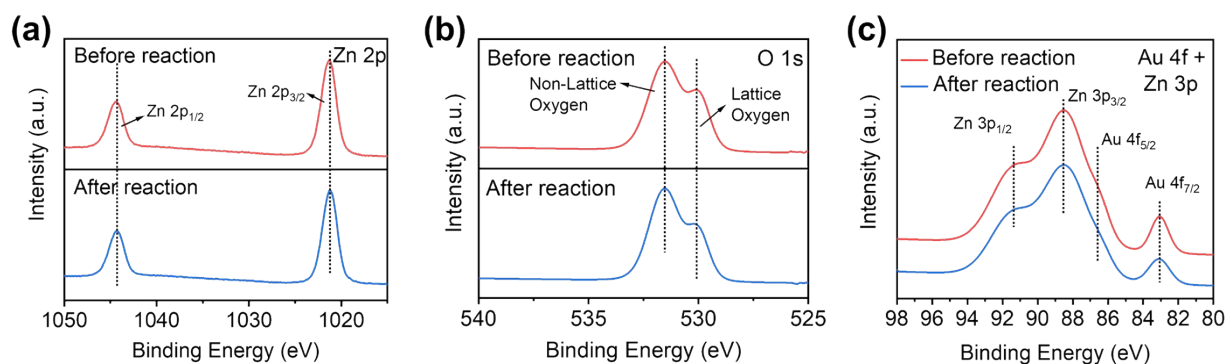

**Figure S10.** XPS spectra of the fresh and spent Au octahedra/ZnO photocatalyst. (a) Zn 2p, (b) O 1s and (c) Au 4f + Zn 3p spectra.



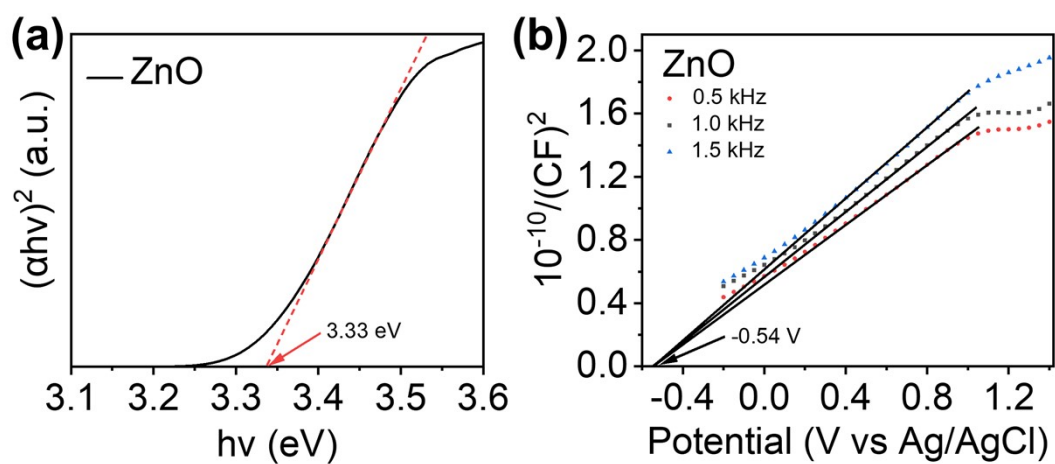

**Figure S11.** a) Tauc plots of ZnO nanosheets. b) Mott-Schottky curves of ZnO nanosheets. The flat band potential of ZnO can be obtained from Mott-Schottky measurements.

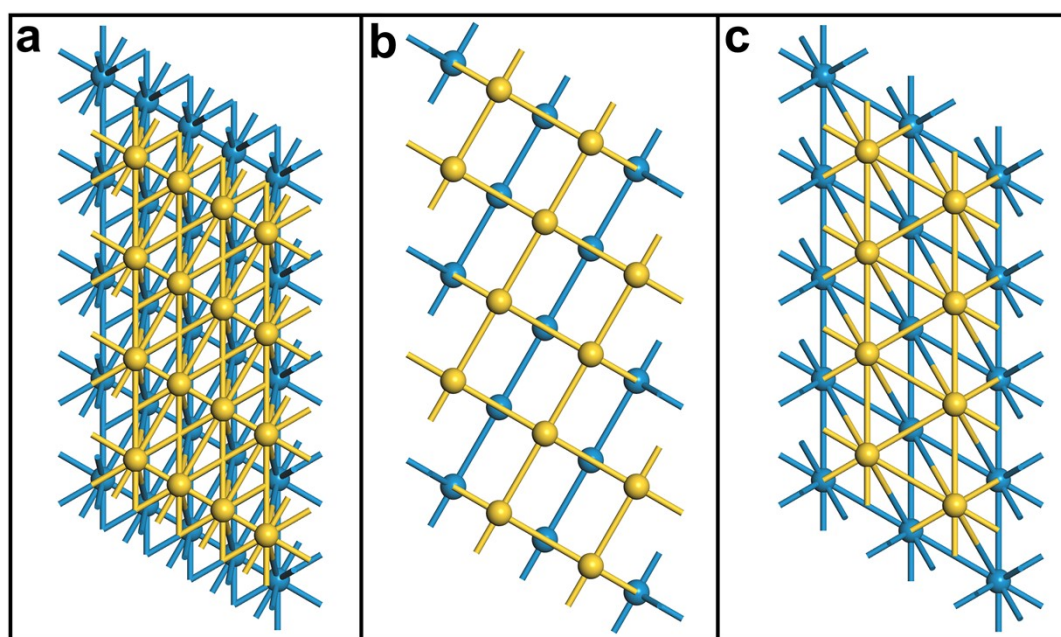

**Figure S12.** Model systems for a) Au(111), b) Au(100), c) Au(110).

**Table S1.** ICP-OES results of the final catalysts.

| Catalysts                  | Content of Au (wt%) |
|----------------------------|---------------------|
| Au octahedra/ZnO           | 2.81                |
| Au cube/ZnO                | 2.88                |
| Au rhombic dodecahedra/ZnO | 2.89                |

**Table S2.** List of the values of the crystallographic orientation index ( $N$ ) of Au octahedra/ZnO and Au cube/ZnO.

| Catalysts        | $N_{\text{Au}(111)}$ | $N_{\text{Au}(100)}$ | $N_{\text{Au}(110)}$ |
|------------------|----------------------|----------------------|----------------------|
| Au octahedra/ZnO | 1.32                 | 0.62                 | 0.59                 |
| Au cube/ZnO      | 0.87                 | 1.40                 | 0.74                 |

**Table S3.** The binding energy (BE) of Au 4f orbitals for all samples.

| Samples                    | BE (Au 4f <sub>5/2</sub> ) | BE (Au 4f <sub>7/2</sub> ) |
|----------------------------|----------------------------|----------------------------|
| Au octahedra               | 87.9 eV                    | 84.2 eV                    |
| Au cube                    | 87.7 eV                    | 84.0 eV                    |
| Au rhombic dodecahedra     | 87.7 eV                    | 84.0 eV                    |
| Au octahedra/ZnO           | 86.4 eV                    | 83.0 eV                    |
| Au cube/ZnO                | 86.6 eV                    | 83.4 eV                    |
| Au rhombic dodecahedra/ZnO | 86.6 eV                    | 83.3 eV                    |



**Table S4.** Representative works on photocatalytic NOCM reaction at room temperature and atmospheric pressure.

| Catalyst                                    | Conditions          |                                                                       |               | Product (C <sub>2</sub> H <sub>6</sub> )   | Reference |
|---------------------------------------------|---------------------|-----------------------------------------------------------------------|---------------|--------------------------------------------|-----------|
|                                             | Temperature         | Light                                                                 | Reactor       |                                            |           |
| Au(111)/ZnO                                 | 298 K               | 300 W Xe lamp<br>(350 < $\lambda$ < 780 nm)                           | Flow reactor  | 39.0 $\mu\text{mol g}^{-1} \text{h}^{-1}$  | This work |
| Au(100)/ZnO                                 |                     |                                                                       |               | 24.9 $\mu\text{mol g}^{-1} \text{h}^{-1}$  |           |
| Au(110)/ZnO                                 | 303 K               | 150 W high-pressure Hg lamp                                           | Batch reactor | 20.6 $\mu\text{mol g}^{-1} \text{h}^{-1}$  | 1         |
| (Zn <sup>+</sup> , Zn <sup>2+</sup> )-ZSM-5 |                     |                                                                       |               | 9.8 $\mu\text{mol g}^{-1} \text{h}^{-1}$   |           |
| Ga <sup>3+</sup> /EST-10                    | 303 K               | 150 W high-pressure Hg lamp                                           | Batch reactor | 29.8 $\mu\text{mol g}^{-1} \text{h}^{-1}$  | 2         |
| 4.8 mol% Au/ZnO                             | Ambient temperature | 300 W Xe lamp<br>(320 < $\lambda$ < 2500 nm), 600 mW cm <sup>-2</sup> | Batch reactor | 13.3 $\mu\text{mol g}^{-1} \text{h}^{-1}$  | 3         |
| Pt/Ga-TiO <sub>2</sub> -SiO <sub>2</sub>    | 333 K               | 300 W Xe lamp                                                         | Batch reactor | 1.57 $\mu\text{mol g}^{-1} \text{h}^{-1}$  | 4         |
| Au/TiO <sub>2</sub> (P25)                   | 298 K               | 300 W Xe lamp<br>(AM 1.5 G, 100 mW cm <sup>-2</sup> )                 | Flow reactor  | 81.74 $\mu\text{mol g}^{-1} \text{h}^{-1}$ | 5         |
| Nb-TiO <sub>2</sub> -SiO <sub>2</sub>       | Ambient temperature | 300 W Xe lamp                                                         | Batch reactor | ~2.0 $\mu\text{mol g}^{-1} \text{h}^{-1}$  | 6         |
| GaN/ZnO                                     | 293 K               | 300 W Xe lamp<br>(200 < $\lambda$ < 400 nm)                           | Batch reactor | 165 $\mu\text{mol g}^{-1} \text{h}^{-1}$   | 7         |
| AuPd/ZnO                                    | 298 K               | 300 W Xe lamp                                                         | Batch reactor | 36.7 $\mu\text{mol g}^{-1} \text{h}^{-1}$  | 8         |
| Cu/Si-doped TiO <sub>2</sub>                | 298 K               | 300 W Xe lamp                                                         | Flow reactor  | 33.8 $\mu\text{mol g}^{-1} \text{h}^{-1}$  | 9         |

## Reference

- 1 L. Li, G.-D. Li, C. Yan, X.-Y. Mu, X.-L. Pan, X.-X. Zou, K.-X. Wang and J.-S. Chen, Efficient Sunlight-Driven Dehydrogenative Coupling of Methane to Ethane over a Zn<sup>+</sup>-Modified Zeolite, *Angew. Chem. Int. Ed.*, 2011, **50**, 8299-8303.
- 2 L. Li, Y. Y. Cai, G. D. Li, X. Y. Mu, K. X. Wang and J. S. Chen, Synergistic effect on the photoactivation of the methane C-H bond over Ga<sup>3+</sup>-modified ETS-10, *Angew. Chem. Int. Ed.*, 2012, **51**, 4702-4706.
- 3 L. Meng, Z. Chen, Z. Ma, S. He, Y. Hou, H.-H. Li, R. Yuan, X.-H. Huang, X. Wang, X. Wang and J. Long, Gold plasmon-induced photocatalytic dehydrogenative coupling of methane to ethane on polar oxide surfaces, *Energy Environ. Sci.*, 2018, **11**, 294-298.
- 4 S. Wu, X. Tan, J. Lei, H. Chen, L. Wang and J. Zhang, Ga-Doped and Pt-Loaded Porous TiO<sub>2</sub>-SiO<sub>2</sub> for Photocatalytic Nonoxidative Coupling of Methane, *J. Am. Chem. Soc.*, 2019, **141**, 6592-6600.
- 5 J. Lang, Y. Ma, X. Wu, Y. Jiang and Y. H. Hu, Highly efficient light-driven methane coupling under ambient conditions based on an integrated design of a photocatalytic system, *Green Chem.*, 2020, **22**, 4669-4675.
- 6 Z. Chen, S. Wu, J. Ma, S. Mine, T. Toyao, M. Matsuoka, L. Wang and J. Zhang, Non-oxidative Coupling of Methane: N-type Doping of Niobium Single Atoms in TiO<sub>2</sub>-SiO<sub>2</sub> Induces Electron Localization, *Angew. Chem. Int. Ed.*, 2021, **60**, 11901-11909.
- 7 G. Wang, X. Mu, J. Li, Q. Zhan, Y. Qian, X. Mu and L. Li, Light-Induced Nonoxidative Coupling of Methane Using Stable Solid Solutions, *Angew. Chem. Int. Ed.*, 2021, **60**, 20760-20764.
- 8 W. Jiang, J. Low, K. Mao, D. Duan, S. Chen, W. Liu, C.-W. Pao, J. Ma, S. Sang, C. Shu, X. Zhan, Z. Qi, H. Zhang, Z. Liu, X. Wu, R. Long, L. Song and Y. Xiong, Pd-Modified ZnO-Au Enabling Alkoxy Intermediates Formation and Dehydrogenation for Photocatalytic Conversion of Methane to Ethylene, *J. Am. Chem. Soc.*, 2021, **143**, 269-278.
- 9 J. Ma, J. Low, D. Wu, W. Gong, H. Liu, D. Liu, R. Long and Y. Xiong, Cu and Si co-doping on TiO<sub>2</sub> nanosheets to modulate reactive oxygen species for efficient photocatalytic methane conversion, *Nanoscale Horiz.*, 2022, **8**, 63-68.
